# Supplementary material
Source: HighWire-hosted journal article supplement (https://www.cfp.ca/content/suppl/2026/03/03/72.3.e59)
Supplement: Annexe_1_Tools_for_Providers.pdf [file Annexe_1_Tools_for_Providers.pdf]

## Studied tools to help address potentially inappropriate prescribing

### Explicit Criteria-Based Tools

STOPP/START Criteria

<https://pmc.ncbi.nlm.nih.gov/articles/PMC10447584/>

<https://www.cgakit.com/m-2-stopp-start>

Beers Criteria

<https://agsjournals.onlinelibrary.wiley.com/doi/epdf/10.1111/jgs.18372>

<https://www.cgakit.com/m2-meds-review>

<https://agsjournals.onlinelibrary.wiley.com/doi/epdf/10.1111/jgs.19500?fbclid=IwQ0xDSwLucv5leHRuA2FlbQIxMQABHq1L->

[b2xzGgGeng\\_J2moFo0l8t4LYemRm8SEnnpNYiFkJoVoB9HokxU2kE93\\_aem\\_tkCzZZj2lqesyOEJGhT7UQ](https://agsjournals.onlinelibrary.wiley.com/doi/epdf/10.1111/jgs.19500?fbclid=IwQ0xDSwLucv5leHRuA2FlbQIxMQABHq1L-b2xzGgGeng_J2moFo0l8t4LYemRm8SEnnpNYiFkJoVoB9HokxU2kE93_aem_tkCzZZj2lqesyOEJGhT7UQ)

PRISCUS List

<https://pmc.ncbi.nlm.nih.gov/articles/PMC2933536/>

EU(7)-PIM List

<https://pmc.ncbi.nlm.nih.gov/articles/PMC4464049/>

NORGEF Criteria

<https://pmc.ncbi.nlm.nih.gov/articles/PMC3413187/>

<https://pmc.ncbi.nlm.nih.gov/articles/PMC4834501/>

FORTA (Fit FOR The Aged) List

<https://pmc.ncbi.nlm.nih.gov/articles/PMC8934757/>

<https://pmc.ncbi.nlm.nih.gov/articles/PMC12660370/>

Anticholinergic Burden Scale

<https://www.acbcalc.com/>

Drug Burden Index (DBI)

<https://www.gmedss.com/about>

### Implicit Tools

Medication Appropriateness Index (MAI)

<https://www.cgakit.com/m-2-mai>

<https://globalrph.com/medcalcs/medication-appropriateness-index-calculator/>

Assessing Care of Vulnerable Elders (ACOVE) Indicators

[https://www.acpjournals.org/doi/10.7326/0003-4819-135-8\\_part\\_2-200110161-00002?url\\_ver=Z39.88-2003&rfr\\_id=ori:rid:crossref.org&rfr\\_dat=cr\\_pub%20%20pubmed](https://www.acpjournals.org/doi/10.7326/0003-4819-135-8_part_2-200110161-00002?url_ver=Z39.88-2003&rfr_id=ori:rid:crossref.org&rfr_dat=cr_pub%20%20pubmed)

Good Palliative-Geriatric Practice (GP-GP) Algorithm

<https://www.bmj.com/content/369/bmj.m1822>

### **Medication Review Frameworks**

Pharmaceutical care network Europe classification for drug related problems

[https://pcne.org/wp-content/uploads/2026/02/PCNE\\_classification\\_V5.pdf](https://pcne.org/wp-content/uploads/2026/02/PCNE_classification_V5.pdf)

Strand Classification of Drug Therapy Problems

<https://pubmed.ncbi.nlm.nih.gov/2275235/>

### **Medication Risk Databases**

Meds75+

[https://fimea.fi/en/databases\\_and\\_registeries/medicines\\_information/database\\_of\\_medication\\_for\\_older\\_persons](https://fimea.fi/en/databases_and_registeries/medicines_information/database_of_medication_for_older_persons)

PHARAO

<https://pubmed.ncbi.nlm.nih.gov/29198061/>

### **Additional resources**

Managing polypharmacy toolkit for clinicians

[https://www.cda-amc.ca/sites/default/files/corporate/corp\\_committees/Expert\\_Panel-Appropriate\\_Use/5\\_Tips\\_Manage\\_Polypharmacy\\_Toolkit\\_EN.pdf](https://www.cda-amc.ca/sites/default/files/corporate/corp_committees/Expert_Panel-Appropriate_Use/5_Tips_Manage_Polypharmacy_Toolkit_EN.pdf)

Managing polypharmacy toolkit for patients

[https://www.cda-amc.ca/sites/default/files/corporate/corp\\_committees/Expert\\_Panel-Appropriate\\_Use/5Q-Toolkit-8.25.2025-English.pdf](https://www.cda-amc.ca/sites/default/files/corporate/corp_committees/Expert_Panel-Appropriate_Use/5Q-Toolkit-8.25.2025-English.pdf)

Deprescribing resources

[deprescribingnetwork.ca/professionals](https://deprescribingnetwork.ca/professionals)

<https://deprescribing.org/resources/>

Canada's Drug Agency resources

<https://www.cda-amc.ca/appropriate-use-our-work>

### Source

This document includes examples of the tools used in clinical trials that were included in the systematic review that supported this guideline.

Persaud N, Workentin A, Rizvi A, Pierson T, Bortolussi-Courval É, Liu K, Bennett A, Shaver N, Skidmore B, Vyas N, Pap R, Almoli F, Lee TC, Sirois C, McCracken RK, Papillon-Ferland L, McDonald EG. Interventions to Address Potentially Inappropriate Prescribing for Older Primary Care Patients: A Systematic Review and Meta-Analysis. *JAMA Netw Open*. 2025 Jun 2;8(6):e2517965. doi: 10.1001/jamanetworkopen.2025.17965. PMID: 40577011; PMCID: PMC12205406.

<https://pubmed.ncbi.nlm.nih.gov/40577011/>
